# Supplementary material for: Surface Characterization of Colloidal Silica Nanoparticles by Second Harmonic Scattering: Quantifying the Surface Potential and Interfacial Water Order
Source: PubMed Central journal article supplement — J Phys Chem C Nanomater Interfaces. 2019 Jul 26;123(33):20393–404. doi: 10.1021/acs.jpcc.9b05482 (PMC9182216; doi:10.1021/acs.jpcc.9b05482), 2019-07-26
Supplement: jp9b05482_si_001.pdf [file jp9b05482_si_001.pdf]

# Surface Characterization of Colloidal Silica Nanoparticles by Second Harmonic Scattering: Quantifying the Surface Potential and Interfacial Water Order

Arianna Marchioro,<sup>1</sup> Marie Bischoff,<sup>1</sup> Cornelis Lütgebaucks,<sup>1</sup> Denys Biriukov,<sup>2</sup> Milan Předota,<sup>2</sup> and Sylvie Roke<sup>1\*</sup>

<sup>1</sup>*Laboratory for fundamental BioPhotonics (LBP), Institute of Bioengineering (IBI), and Institute of Materials Science (IMX), School of Engineering (STI), Ecole Polytechnique Fédérale de Lausanne (EPFL), CH-1015 Lausanne, Switzerland, . \*E-mail: sylvie.roke@epfl.ch*

<sup>2</sup>*Institute of Physics, Faculty of Science, University of South Bohemia, 370 05 České Budějovice, Czech Republic*

## Shorthand notations for independent tensor components

**Table S1:** Overview of the shorthand notation for independent tensor components used in this work.

| Indexed component | Tensor component                                                                                                                                    |
|-------------------|-----------------------------------------------------------------------------------------------------------------------------------------------------|
| $\chi_1^{(2)}$    | $\chi_{\perp\perp\perp}^{(2)} - \chi_{\parallel\parallel\perp}^{(2)} - \chi_{\parallel\perp\parallel}^{(2)} - \chi_{\perp\parallel\parallel}^{(2)}$ |
| $\chi_2^{(2)}$    | $\chi_{\parallel\parallel\perp}^{(2)}$                                                                                                              |
| $\chi_3^{(2)}$    | $\chi_{\parallel\perp\parallel}^{(2)}$                                                                                                              |
| $\chi_4^{(2)}$    | $\chi_{\perp\parallel\parallel}^{(2)}$                                                                                                              |

## Parameters used for surface potential fitting

**Table S2:** Parameters used for the AR-SHS fits of NaOH series

| NaOH addition                             | pH 5.7               | pH 10                | pH 11                |
|-------------------------------------------|----------------------|----------------------|----------------------|
| Radius (nm)                               | 145                  | 148                  | 142                  |
| Second harmonic wavelength (nm)           | 515                  | 515                  | 515                  |
| Refractive index of the particle (silica) | 1.46                 | 1.46                 | 1.46                 |
| Refractive index of the solvent (water)   | 1.33                 | 1.33                 | 1.33                 |
| Temperature (°C)                          | 23                   | 23                   | 23                   |
| Number of particles (particles/ml)        | $3.50 \cdot 10^{10}$ | $3.50 \cdot 10^{10}$ | $3.50 \cdot 10^{10}$ |
| Concentration of ions (M)                 | $4.02 \cdot 10^{-6}$ | 0.0001               | 0.001                |

**Table S3:** Parameters used for the AR-SHS fits of NaCl series

| NaCl addition                             | pH 10                | pH 10 + 0.1mM NaCl   | pH 10 + 1 mM NaCl    | pH 10 + 10mM NaCl    |
|-------------------------------------------|----------------------|----------------------|----------------------|----------------------|
| Radius (nm)                               | 147                  | 146                  | 142                  | 143                  |
| Second harmonic wavelength (nm)           | 515                  | 515                  | 515                  | 515                  |
| Refractive index of the particle (silica) | 1.46                 | 1.46                 | 1.46                 | 1.46                 |
| Refractive index of the solvent (water)   | 1.33                 | 1.33                 | 1.33                 | 1.33                 |
| Temperature (°C)                          | 23                   | 23                   | 23                   | 23                   |
| Number of particles (particles/ml)        | $3.50 \cdot 10^{10}$ | $3.50 \cdot 10^{10}$ | $3.50 \cdot 10^{10}$ | $3.50 \cdot 10^{10}$ |
| Concentration of ions (M)                 | $1 \cdot 10^{-4}$    | $2 \cdot 10^{-4}$    | 0.0011               | 0.0101               |
